# Supplementary material for: Comparative chloroplast genomics of three species of Bulbophyllum section Cirrhopetalum (Orchidaceae), with an emphasis on the description of a new species from Eastern Himalaya
Source: PeerJ. 2023 Feb 10;11:e14721. doi: 10.7717/peerj.14721 (PMC9924136; doi:10.7717/peerj.14721)
Supplement: Supplemental Information 1 [file peerj-11-14721-s001.xlsx]

## Sheet: Table S1
Table S1. Sampling and accession information for Bulbophyllum and Dendrobium species in this study.
Taxa	Section (Chen & Vermuelen, 2009)	Chloroplast genome	ITS	matK	psbA-trnH	Reference
Bulbophyllum inconspicuum Maxim.		MN221389	(-)	(-)	(-)	Kim et al., 2020
Bulbophyllum plumosum Barb.Rodr.		MN580547	(-)	(-)	(-)	Zavala-Páez et al. 2020
Bulbophyllum exaltatum Lindl.		MN604054	(-)	(-)	(-)	Zavala-Páez et al. 2020
Bulbophyllum granulosum Barb.Rodr		MN604055	(-)	(-)	(-)	Zavala-Páez et al. 2020
Bulbophyllum mentosum Barb.Robr.		MN604056	(-)	(-)	(-)	Zavala-Páez et al. 2020
Bulbophyllum regnellii Rchb.f		MN604057	(-)	(-)	(-)	Zavala-Páez et al. 2020
Bulbophyllum steyermarkii Foldats		MN604058	(-)	(-)	(-)	Zavala-Páez et al. 2020
Bulbophyllum weddellii (Lindl.) Rchb.f		MN604059	(-)	(-)	(-)	Zavala-Páez et al. 2020
Bulbophyllum epiphytum Barb.Robr.		MN737573	(-)	(-)	(-)	Zavala-Páez et al. 2020
Bulbophyllum menghaiense Z. H. Tsi	Macrocaulia	MW161050	(-)	(-)	(-)	Tang et al. 2021
Bulbophyllum lingii M.Z.Huang, G.S.Yang & J.M.Yin	Macrocaulia	MW161051	(-)	(-)	(-)	Tang et al. 2021
Bulbophyllum pentanurum Seidenf.	Macrocaulia	MW161052	(-)	(-)	(-)	Tang et al. 2021
Bulbophyllum pingnanense J. F. Liu, S. R. Lan & Y. C. Liang	Cirropetalum	MW822749	OM441937	MW822749	MW822749	Zhang et al., 2021; This study
Bulbophyllum pilopetalum M. K. Li, J. P. Deng & Y. Luo	Cirropetalum	OM459712	OM441938	OM459824	OM459823	This study
Bulbophyllum albociliatum (T. S. Liu et H. J. Su) Seidenf.	Cirropetalum	OM524485	MK164426	MK178011	MK177912	Hu et al.2020
Bulbophyllum albociliatum var. weiminianum T. P. Lin & Kuo Huang	Cirropetalum	(-)	MK164531	MK178109	MK178007	Hu et al.2020
Bulbophyllum bicolor Lindl.	Zhonghuazu	(-)	MK178016	MK178016	MK177917	Hu et al.2020
Bulbophyllum brevipedunculatum T. C. Hsu & S. W. Chung	Cirropetalum	(-)	MK164439	MK178022	MK177923	Hu et al.2020
Bulbophyllum caudatum Lindl.	Umbellata	(-)	MK164442	MK178025	MK177925	Hu et al.2020
Bulbophyllum corallinum Tix et Guillaum	Corymbosa	(-)	MK164443	MK178026	MK177926	Hu et al.2020
Bulbophyllum dayanum Rchb.f.	Acrochaene	(-)	MK164447	MK178028	MK177930	Hu et al.2020
Bulbophyllum delitescens Hance	Umbellata	(-)	MK164448	MK178029	MK177931	Hu et al.2020
Bulbophyllum emarginatum (Finet) J. J. Smith	Zhonghuazu	(-)	MK164451	MK178032	MK177934	Hu et al.2020
Bulbophyllum fimbriperianthium W. M. Lin	Cirrhopetalum	(-)	MK164455	MK178036	MK177938	Hu et al.2020
Bulbophyllum hirundinis (Gagnep.) Seidenf.	Cirrhopetalum	(-)	MK164461	MK178042	MK177944	Hu et al.2020
Bulbophyllum insulsoides Seidenf.	Suihuazu	(-)	MK164462	MK178043	MK177945	Hu et al.2020
Bulbophyllum kuanwuense S. W. Chung & T. C. Hsu	Cirrhopetalum	(-)	/	MK178048	MK177949	Hu et al.2020
Bulbophyllum lepidum (Blume) J. J. Smith	Cirrhopetalum	(-)	MK164470	MK178053	MK177952	Hu et al.2020
Bulbophyllum levinei Schltr.	Suihuazu	(-)	MK164471	MK178054	MK177953	Hu et al.2020
Bulbophyllum macraei (Lindl.) Rchb.	Umbellata	(-)	MK164475	MK178059	MK177957	Hu et al.2020
Bulbophyllum odoratissimum Lindl.	Corymbosa	(-)	MK164483	MK178066	MK177964	Hu et al.2020
Bulbophyllum pecten-veneris (Gagnepain) Seidenfaden	Cirrhopetalum	(-)	MK164486	MK178068	MK177966	Hu et al.2020
Bulbophyllum retusiusculum Rchb. f.	Umbellata	(-)	MK164500	MK178080	MK177977	Hu et al.2020
Bulbophyllum rothschildianum (O'Brien) J. J. Smith	Cirrhopetalum	(-)	MK164502	MK178082	MK177979	Hu et al.2020
Bulbophyllum shweliense W. W. Sm.	Corymbosa	(-)	MK164507	MK178085	MK177982	Hu et al.2020
Bulbophyllum spathulatum (Rolfe ex Cooper) Seidenf.	Umbellata	(-)	MK165478	MK178090	MK177988	Hu et al.2020
Bulbophyllum sutepense (Rolfe ex Downie) Seidenf. et Smitin	Corymbosa	(-)	MK164516	MK178094	MK177992	Hu et al.2020
Bulbophyllum taeniophyllum Par. et Rchb.	Zhonghuazu	(-)	MK164517	MK178095	MK177993	Hu et al.2020
Bulbophyllum taiwanense (Fukuyama) Seidenf.	Cirrhopetalum	(-)	KY022460	MK178096	MK177994	Wang et al. 2017; Hu et al.2020
Bulbophyllum tigridum Hance	Umbellata	(-)	MK164520	MK178098	MK177996	Hu et al.2020
Bulbophyllum umbellatum Lindl.	Umbellata	(-)	MK164525	MK178103	MK178001	Hu et al.2020
Bulbophyllum unciniferum Seidenf.	Umbellata	(-)	MK164526	MK178104	MK178002	Hu et al.2020
Bulbophyllum violaceolabellum Seidenf.	Umbellata	(-)	MK164528	MK178106	MK178004	Hu et al.2020
Bulbophyllum wendlandianum (Kraenzl.) Dammer	Cirrhopetalum	(-)	MK164532	MK178110	MK178008	Hu et al.2020
Bulbophyllum wuzhishanense X. H. Jin	Corymbosa	(-)	MK164533	MK178111	MK178009	Hu et al.2020
Dendrobium wattii (Hooker) Reichenbach		MN913340	KF143525	MN913340	KF177562	Wang et al. 2020; Xiang et al.2013
Dendrobium wangliangii G.W.Hu, C.L.Long & X.H.Jin		MT798588	KF143524	MT798588	KF177561	Shao et al., 2020; Xiang et al.2013
* A dash (-) indicated that data was not available.
