# Supplementary material for: Comparative chloroplast genomics of three species of Bulbophyllum section Cirrhopetalum (Orchidaceae), with an emphasis on the description of a new species from Eastern Himalaya
Source: PeerJ. 2023 Feb 10;11:e14721. doi: 10.7717/peerj.14721 (PMC9924136; doi:10.7717/peerj.14721)
Supplement: Supplemental Information 2 [file peerj-11-14721-s002.xlsx]

## Sheet: Table S2
Table S2. The characters of indels (>10 bp) in the chloroplast genomes of three Bulbophyllum species. "1" insersion; "0" deletion
Indel sequence	start	end	size	Location (gene name)	B. albociliatum	B. pingnanense	B. piloopetalum
ATGAAAATAAA	1702	1712	11	psbA-matK	0	1	1
TTTTTTATCA	4949	4958	10	rps16	0	0	1
GAATTTCTATTTCTATCTAGAATTTC	5295	5320	26	intron-rps16	0	1	1
ATAGAAAGAATAG	5345	5357	13	intron-rps16	1	0	1
TAAATTTTAAT	6558	6568	11	rps16-psbK	1	0	0
ATACTAAATTAAA	6593	6605	13	rps16-psbK	0	1	0
TTCAATTCATAAAGTATTCG	7697	7716	20	psbK-psbI	0	1	1
AAATTATATATAATATATATAATATATATATATATATATATATATATATATATAG	8896	8950	55	psbI-atpA	0	0	1
TTTACTACACTTAT	14253	14266	14	atpH-atpI	0	0	1
CTTTTATGTTT	23053	23063	11	intron-rpoC1	1	1	0
TAATTGATATTC	28147	28158	12	rpoB-psbD	1	0	0
ATATATATATATATAG	30920	30935	16	psbM-petD	0	0	1
AATTAAGAATCTGATCTTAATTGG	37564	37587	24	psbZ-rps14	0	0	1
TTTTTTTTTCTATTCCTAAATTAAATACG	45501	45529	29	intron-ycf3	1	1	0
ATAATTAATATATTAATAATTAATATATATTAATATATTAATAT	66763	66806	44	psbE-petL	0	1	1
ATTAATATATATTAATATATTAATAT	66781	66806	26	psbE-petL	0	1	1
AGAGTAATAGTAA	68978	68990	13	psaJ-rpl33	0	0	1
GTTAGTAACTTTT	69117	69129	13	psaJ-rpl33	0	0	1
TTTTTTCTATTTTTATATA	73945	73963	19	clpP-psbB	0	1	0
TATATAAATAATA	74011	74023	13	clpP-psbB	1	0	1
CTTAATATTATTATTAT	74046	74062	17	clpP-psbB	1	0	1
CTAGAATTAAG	76231	76241	11	psbB-psbT	1	0	1
TAATTATTTTATTTATTTC	76299	76317	19	psbB-psbT	0	1	0
GAATGAAATGATTCAAT	84266	84282	17	intron-rpl16	1	0	0
TTTTCTTTTA	85335	85344	10	rpl16-rps3	0	0	1
ATATTATTATA	102545	102555	11	rps12-rpl32	1	0	0
TTAGAATTATTT	102581	102592	12	rps12-rpl32	0	1	0
TATTGTATGTGTTCCTAAGA	103023	103042	20	rps12-rpl32	0	0	1
ACGAAGATACTAATTA	113103	113118	16	rpl32-ccsA	0	1	0
TTCTATATGTATATGAATCTATATAGATTCATATACATATAGAAATA	116850	116896	47	psaC-ndhE	0	1	1
TTAGTTATAGAATAG	116978	116993	16	psaC-ndhE	1	1	0
CCCTTTCTTCAAAAAAAAGGGAAGGGTTTTCTTCGGTGGATCCCTCTTGTTCCTGTTTAGTCTCCTTCATTTCGGAAGTTGTTTCTACATCGCTTTCTTCCTTTCTTTCTC	125117	125227	111	ycf1	1	1	0
TCTTAGGAACACATACAATA	135258	135277	20	ycf1-rpl2	0	0	1
AAATAATTCTAA	135716	135727	12	ycf1-rpl2	0	1	0
ATAATATTATA	135754	135764	11	ycf1-rpl2	1	0	0
TCACTATCATCAATATCGTCACTATCATCA	143875	143904	30	ycf2	0	1	0
